# Supplementary material for: A systematic review of antibody mediated immunity to coronaviruses: kinetics, correlates of protection, and association with severity
Source: PubMed Central journal article supplement (PMC7499300; doi:10.1038/s41467-020-18450-4), 2020-09-17
Supplement: 41467_2020_18450_MOESM4_ESM.pdf [file 41467_2020_18450_MOESM4_ESM.pdf]

### **Description of Additional Supplementary Files**

File Name: Supplementary Data 1

Description: Data digitized on antibody kinetics and association of antibody responses with clinical severity.

File Name: Supplementary Data 2

Description: Data digitized on cross-reactivity and antigenic diversity.

File Name: Supplementary Data 3

Description: Data digitized on population seroprevalence.
